# Supplementary material for: A highly transparent humidity sensor with fast response speed based on α-MoO3 thin films
Source: Royal Society of Chemistry journal article supplement (doi:10.1039/d0ra03958f), 2020-01-01
Supplement: d0ra03958f1.pdf [file d0ra03958f1.pdf]

## **A highly transparent humidity sensor with fast response speed based on $\alpha$ -MoO<sub>3</sub> thin films**

*Hailong Ma,<sup>a</sup> Huajing Fang,<sup>\*a</sup> Wenting Wu,<sup>a</sup> Cheng Zheng,<sup>b</sup> Liangliang Wu,<sup>b</sup> and Hong Wang<sup>\*c</sup>*

a, State Key Laboratory for Mechanical Behavior of Materials, School of Material Science and Engineering, Xi'an Jiaotong University, Xi'an 710049, China.

b, School of Electronic and Information Engineering and State Key Laboratory for Mechanical Behavior of Materials, Xi'an Jiaotong University, Xi'an 710049, China.

c, Department of Materials Science and Engineering & Shenzhen Engineering Research Center for Novel Electronic Information Materials and Devices, Southern University of Science and Technology, Shenzhen 518055, China.

*E-mail: [fanghj@xjtu.edu.cn](mailto:fanghj@xjtu.edu.cn) and [wangh6@sustech.edu.cn](mailto:wangh6@sustech.edu.cn)*

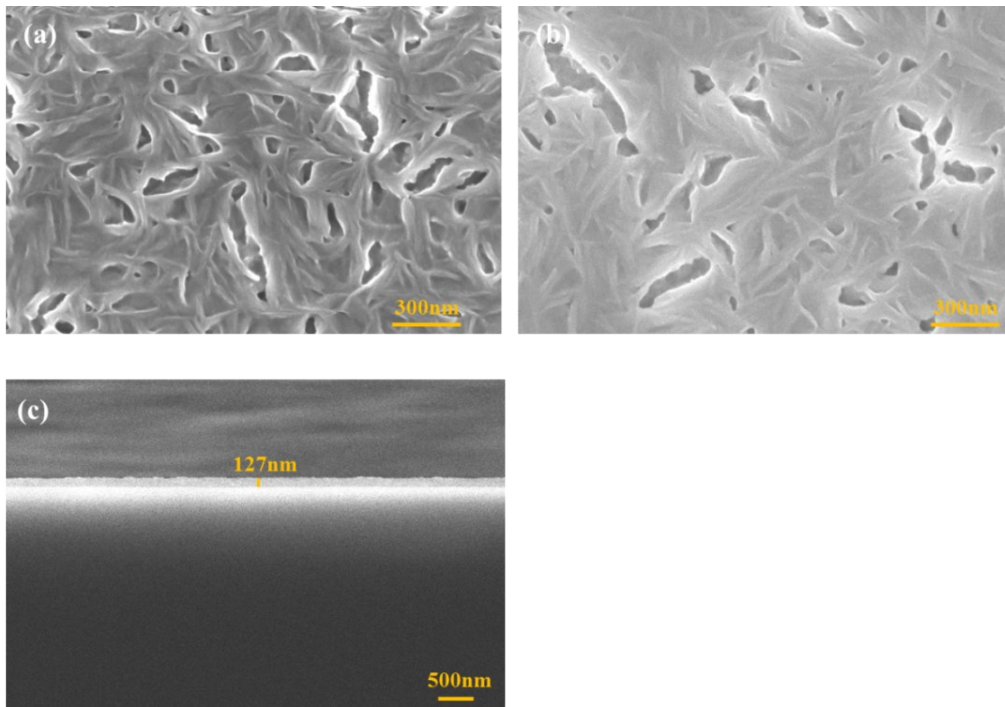

**Fig.S1** SEM images of the  $\text{H}_2\text{MoO}_5$  thin film on the surface of (a) channel and (b) FTO electrode. (c) Cross-sectional SEM image of the  $\text{H}_2\text{MoO}_5$  thin film on the surface of channel.

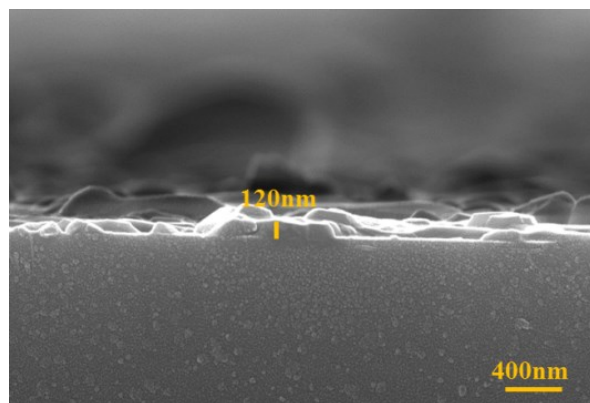

**Fig.S2** Cross-sectional SEM image of the  $\alpha\text{-MoO}_3$  thin film on the surface of channel

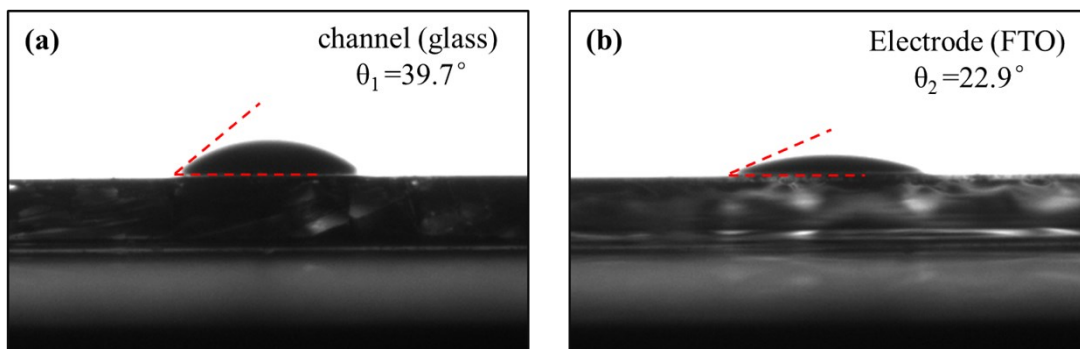

**Fig.S3** The contact angles of the molybdate solution with the (a) channel (glass) and (b) electrode (FTO).

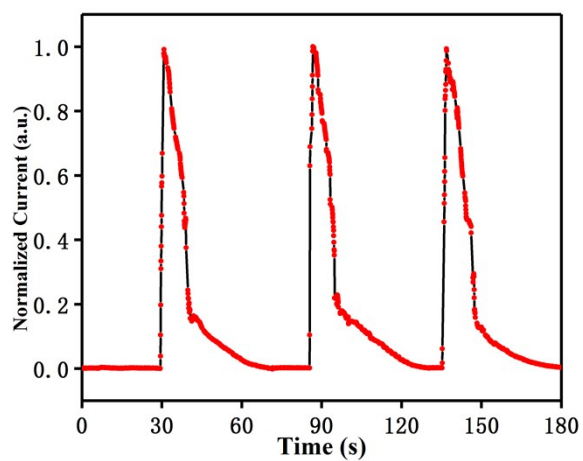

**Fig.S4** The cycling performance of the humidity sensor between 11% and 95% RH.
